# Supplementary material for: Photofragment ionization-loss stimulated Raman spectroscopy of a hydrated neurotransmitter: 2-phenylethylamine–water
Source: Royal Society of Chemistry journal article supplement (doi:10.1039/c4ra10493e), 2014-01-01
Supplement: c4ra10493e1.pdf [file c4ra10493e1.pdf]

**Supplementary Information for**

**Photofragment Ionization-loss Stimulated Raman Spectroscopy of a Hydrated  
Neurotransmitter: 2-Phenylethylamine–water**

*Nitzan Mayorkas, Snir Cohen, Hanan Sachs, and Ilana Bar\**

**Table S1.** Measured ionization-loss stimulated Raman vibrational transition frequencies ( $\text{cm}^{-1}$ ) of PEA and of PEA- $\text{H}_2\text{O}$ .

| PEA  | PEA- $\text{H}_2\text{O}$ |
|------|---------------------------|
|      | 3716                      |
| 3414 | 3401                      |
| 3346 | 3350                      |
|      | 3328                      |
| 3078 | 3076                      |
| 3065 | 3066                      |
| 3050 | 3053                      |
| 3015 | 3016                      |
|      | 3011                      |
|      | 2973                      |
| 2960 | 2963                      |
| 2934 | 2938                      |
|      | 2929                      |
| 2922 | 2924                      |
| 2865 | 2875                      |
| 2849 | 2869                      |
|      | 2823                      |
| 1612 | 1614                      |
| 1592 | 1592                      |
| 1475 | 1477                      |
| 1445 | 1454                      |
| 1400 |                           |
| 1387 | 1387                      |
| 1344 | 1373                      |
|      | 1353                      |
|      | 1346                      |
|      | 1336                      |
| 1330 | 1326                      |
|      | 1309                      |
| 1208 | 1212                      |
|      | 1198                      |
| 1179 | 1186                      |
|      | 1158                      |

|      |      |
|------|------|
| 1140 | 1143 |
| 1091 |      |
| 1087 |      |
| 1062 | 1076 |
| 1033 | 1036 |
| 1021 |      |
| 1005 | 1007 |
| 994  |      |
| 977  |      |
| 917  | 916  |
| 909  |      |
|      | 889  |
| 864  | 863  |
| 766  | 768  |
| 761  |      |
| 749  | 751  |
| 713  |      |
| 623  | 623  |
| 572  | 573  |
| 491  | 494  |

---
